# Supplementary material for: A mutated B cell chronic lymphocytic leukemia subset that recognizes and responds to fungi
Source: PubMed Central journal article supplement — J Exp Med. 2013 Jan 14;210(1):59–70. doi: 10.1084/jem.20121801 (PMC3549718; doi:10.1084/jem.20121801), 2013-01-14
Supplement: supp_jem.20121801_JEM_20121801_sm.pdf [file supp_jem.20121801_JEM_20121801_sm.pdf]

## SUPPLEMENTAL MATERIAL

Hoogeboom et al., <http://www.jem.org/cgi/content/full/jem.20121801/DC1>**Table S1.** List of microbial species tested for reactivity with V3-7Sh sIgM in Fig. 2

|    | Genus                             | Gram | Strain                    | Reactivity |
|----|-----------------------------------|------|---------------------------|------------|
| 1  | <i>Bacillus subtilis</i>          | +    | IIIB66                    | –          |
| 2  | <i>Bordetella pertussis</i>       | –    | IIIA62                    | –          |
| 3  | <i>Campylobacter jejuni</i>       | –    | IIIA58                    | –          |
| 4  | <i>Enterococcus faecalis</i>      | +    | ATCC 29212                | –          |
| 5  | <i>Enterococcus faecium</i>       | +    | E1162                     | –          |
| 6  | <i>Escherichia coli</i>           | –    | ATCC 25922                | –          |
| 7  | <i>Haemophilus influenzae</i>     | –    | ATCC 49247                | –          |
| 8  | <i>Klebsiella pneumonia</i>       | –    | NTCT 13442                | –          |
| 9  | <i>Lactococcus lactis</i>         | +    | MG1363                    | –          |
| 10 | <i>Listeria monocytogenes</i>     | +    | K292                      | –          |
| 11 | <i>Neisseria meningitidis</i>     | –    | IIIB68                    | –          |
| 12 | <i>Proteus mirabilis</i>          | –    | ATCC 43071                | –          |
| 13 | <i>Salmonella</i> Typhimurium     | –    | Copenhagen                | –          |
| 14 | <i>Serratia marcescens</i>        | –    | ATCC 8100                 | –          |
| 15 | <i>Shigella sonnei</i>            | –    | ATCC 25931                | –          |
| 16 | <i>Staphylococcus aureus</i>      | +    | USA300                    | –          |
| 17 | <i>Staphylococcus epidermidis</i> | +    | ATCC 12228                | –          |
| 18 | <i>Streptococcus pyogenes</i>     | +    | GASm1 5448                | –          |
| 19 | <i>Yersinia enterocolitica</i>    | –    | IIIA63                    | –          |
| 20 | <i>Candida albicans</i>           | NA   | ATCC 10231                | +          |
| 21 | <i>Candida parapsilosis</i>       | NA   | 02-320                    | +          |
| 22 | <i>Candida tropicalis</i>         | NA   |                           | +          |
| 23 | <i>Candida glabrata</i>           | NA   | CBS 861                   | +          |
| 24 | <i>Cryptococcus neoformans</i>    | NA   | H99                       | +/-        |
|    | <i>Cryptococcus neoformans</i>    | NA   | 602/ATCC36555 (acapsular) | +          |
| 25 | <i>Schizosaccharomyces pombe</i>  | NA   | 972/ATCC 24843            | +          |
| 26 | <i>Malassezia furfur</i>          | NA   | CBS 1878                  | +          |
| 27 | <i>Malassezia pachydermatis</i>   | NA   | CBS 1880                  | +          |
| 28 | <i>Saccharomyces cerevisiae</i>   | NA   | CBS 8803                  | +          |
| 29 | <i>Trichosporon asahii</i>        | NA   | CBS 2497                  | +          |
| 30 | <i>Aspergillus fumigatus</i>      | NA   | CBS 144.89                | +          |
| 31 | <i>Penicillium chrysogenum</i>    | NA   | CBS 401.92                | +          |
| 32 | <i>Fonsecaea pedrosoi</i>         | NA   | CBS 271.37                | +          |
| 33 | <i>Rhizopus oryzae</i>            | NA   | CBS 279.38                | +          |

NA, Not applicable

**Table S2.** *IGHV*-, *IGKV*- and *IGLV*-rearrangements of control CLL

| Patient | Mut. | HC V(D)J-rearrangement | HCDR3                            | LC VJ-rearrangement | LCDR3            |
|---------|------|------------------------|----------------------------------|---------------------|------------------|
|         | %    |                        |                                  |                     |                  |
| CLL3    | 100  | IGHV3-30/D3-10/JH3     | C AKSQYRFSLLWFREFPDAFDI W        | IGKV1-33/JK2        | C QQYDNLPLYT F   |
| CLL7    | 100  | IGHV1-69/D3-3/JH6      | C AREGRFLEWLFQQTYYYYGMDV W       | IGKV2D-29/JK4       | C MQSIQPLT F     |
| CLL9    | 93.4 | IGHV1-69/D3-3/JH4      | C ARGPDTEGGYYFY W                | IGLV3-21/JL3        | C QVWDSSSDHPWV F |
| CLL17   | 96.8 | IGHV4-34/D5-5/JH6      | C ARGYPDTPMIRRYYYGMDV W          | IGKV2-30/JK1        | C MQGTHWPWT F    |
| CLL26V  | 95.4 | IGHV4-34/D2-2/JH3      | C ARGVPDCSSASCYLGAFD S W         | IGKV1-6/JK2         | C LQDYNYPYT F    |
| CLL41   | 100  | IGHV1-69/D3-3/JH4      | C ASGIGGGFDY W                   | IGKV3-20/JK1        | C QQYGSSPPWT F   |
| CLL43   | 99.7 | IGHV3-21/JH6           | C ARDQNAMDV W                    | IGLV3-21/JL3        | C QVWDSSSDHPWV F |
| CLL44   | 100  | IGHVH1-69/D3-3/JH6     | C ARNLWDGNDWFSGFNYYYYYGM DV W    | IGLV1-51/JL1        | C GTWDSSLSAYV F  |
| CLL45   | 100  | IGHV1-69/D2-2/JH6      | C ARSPNLIVVPAIPNYYYYYGM DV W     | IGLV6-57/JL2/JL3    | C QSYDSSNV F     |
| CLL46   | 100  | IGHV3-21/D2-2/JH6      | C ARKPVVPAAMPALYYYYYMDV W        | IGKV3-20/JK1        | C QQYGSSPPWT F   |
| CLL47   | 100  | IGHV4-39/D6-13/JH5     | C ASRIGYSSSWYGGWFD P W           | IGKV1-39/JK2        | C QQSYSTPVT F    |
| CLL53   | 96.5 | IGHV3-21/D2-15/JH6     | C ARDANHMDV W                    | IGLV3-21/JL3        | C QVWDGSSDHPWV F |
| CLL54   | 100  | IGHV1-69/D3-3/JH6      | C ARDPKLFDDFWSGYITPAFY YYYGMDV W | IGLV1-51/JL3        | C GTWDSSLSAWV F  |
| CLL55   | 100  | IGHV1-69/D2-2/JH6      | C AIVVPAIYWDRPQYYYYYGM DV W      | IGLV1-44/JL1        | C AAWDDSLNGPYV F |
| CLL57   | 100  | IGHV3-30-3/D3-3/JH6    | C ARATPTYDFWSGSPHY YYYGMDV W     | IGLV1-51/JL3        | C GTWDSSLSVWV F  |
| CLL60   | 99   | IGHV3-21/D1-26/JH6     | C ARDANGMDV W                    | IGLV1-40/JL2        | C QSYDSSLSGPHV F |
| CLL63   | 100  | IGHV1-3/D6-19/JH4      | C AREQWLRIYFDY W                 | IGKV1-39/JK2        | C QQSYSTPPYT F   |
| CLL64   | 93   | IGHV4-34/D5-18/JH6     | C VRGYGDTAVWKRYYYGFDV W          | IGKV2-30/JK4        | C MQGTHWPLT F    |
| CLL65   | 90.2 | IGHV4-34/D4-11/JH6     | C ARGYGTSPTRRYYYGMDV W           | IGKV2-30/JK2        | C MQGTHWPPYT F   |
| CLL81   | 94.4 | IGHV3-7/D3-22/JH3      | C ARGDYDSATYFNDAFDI W            | IGKV3-15/JK1        | C QHYNNWPPWT F   |
| CLL85   | 93.4 | IGHV3-7/D3-10/JH4      | C ARDTQAFRTYSNDF W               | IGLV1-44/JL1        | C AAWDDTLGHEV F  |
| CLL101  | 95.1 | IGHV4-34/D6-19/JH3     | C ARGYGDSPETRRYY YYYGMDV W       | IGKV2-30/JK4        | C MQGTHWPLT F    |
| CLL102  | 93.7 | IGHV4-34/D6-19/JH3     | C ARDIEVAPPDAFDI W               | IGKV3-11/JK2        | C QQGRDWP MYF F  |
| CLL103  | 96.5 | IGHV3-21/D4-23/JH4     | C AR DYADTYGGNSNIRVY W           | IGLV3-21/JL3        | C QVWDSTSDHPWV F |
